# Supplementary material for: Transcriptional Programs Driving Shear Stress-Induced Differentiation of Kidney Proximal Tubule Cells in Culture
Source: Front Physiol. 2020 Oct 30;11:587358. doi: 10.3389/fphys.2020.587358 (PMC7662153; doi:10.3389/fphys.2020.587358)
Supplement: Supplementary Table 4 — Significantly differentially-expressed genes in 96 h OSS vs. 96 h Static calculated using edgeR. [file Table_4.xlsx]

## Sheet: sigOSS 96h vs static 96h
gene	logFC	logCPM	F	PValue	FDR	protein
URAD	7.10112	2.28936	320.397	4.68e-08	6.48e-06	ureidoimidazoline (2-oxo-4-hydroxy-4-carboxy-5-) decarboxylase (URAD), mRNA. (from RefSeq NM_001105577)
VTN	6.065	2.61847	150.059	1.06e-06	3.64e-05	vitronectin (VTN), mRNA. (from RefSeq NM_000638)
CABP7	5.91137	-2.8095	9.53177	0.0192947	0.0475772	calcium binding protein 7 (CABP7), mRNA. (from RefSeq NM_182527)
TTR	5.84743	4.15453	108.508	3.9e-06	8.16e-05	transthyretin (TTR), mRNA. (from RefSeq NM_000371)
APOA2	5.73195	0.788456	61.0504	3.65e-05	0.000373628	apolipoprotein A2 (APOA2), mRNA. (from RefSeq NM_001643)
ANGPTL6	5.32453	-3.27888	11.3181	0.0133663	0.0349503	angiopoietin like 6 (ANGPTL6), transcript variant 1, mRNA. (from RefSeq NM_031917)
KCNJ16	5.18138	1.43282	44.2437	0.000120621	0.000874474	potassium voltage-gated channel subfamily J member 16 (KCNJ16), transcript variant 3, mRNA. (from RefSeq NM_170742)
SDSL	4.89071	0.623856	74.4985	1.7e-05	0.000220336	serine dehydratase like (SDSL), transcript variant 1, mRNA. (from RefSeq NM_138432)
OTC	4.84896	7.67917	187.649	4.26e-07	2.2e-05	ornithine carbamoyltransferase (OTC), mRNA. (from RefSeq NM_000531)
AANAT	4.83292	-3.51399	9.92079	0.0177467	0.0443253	aralkylamine N-acetyltransferase (AANAT), transcript variant 3, non-coding RNA. (from RefSeq NR_110548)
SLC7A2	4.76126	-2.3283	18.3273	0.00232233	0.00835169	solute carrier family 7 member 2 (SLC7A2), transcript variant 1, mRNA. (from RefSeq NM_003046)
FGA	4.53249	2.39398	61.543	3.54e-05	0.000365571	fibrinogen alpha chain (FGA), transcript variant alpha, mRNA. (from RefSeq NM_021871)
AGXT2	4.41797	6.53165	105.847	4.3e-06	8.7e-05	alanine--glyoxylate aminotransferase 2 (AGXT2), transcript variant 2, mRNA. (from RefSeq NM_001306173)
APOH	4.36333	3.2164	99.0587	5.59e-06	0.000104113	apolipoprotein H (APOH), mRNA. (from RefSeq NM_000042)
PLA2G4E	4.23895	-2.59261	14.6346	0.00449082	0.0143196	phospholipase A2 group IVE (PLA2G4E), mRNA. (from RefSeq NM_001206670)
SSUH2	4.0816	0.436175	57.9143	4.45e-05	0.00042723	ssu-2 homolog (SSUH2), transcript variant 1, mRNA. (from RefSeq NM_001256748)
CPO	3.97677	1.89759	87.8398	8.97e-06	0.000142702	carboxypeptidase O (CPO), mRNA. (from RefSeq NM_173077)
MAMDC4	3.89683	5.9217	264.715	1.03e-07	1.01e-05	MAM domain containing 4 (MAMDC4), mRNA. (from RefSeq NM_206920)
SERPINA10	3.87733	3.08331	254.686	1.21e-07	1.06e-05	serpin family A member 10 (SERPINA10), transcript variant 1, mRNA. (from RefSeq NM_016186)
SERPINC1	3.87704	1.5821	80.5242	1.26e-05	0.000180373	serpin family C member 1 (SERPINC1), transcript variant 2, mRNA. (from RefSeq NM_001365052)
UROC1	3.84436	3.8093	99.8827	5.41e-06	0.000101535	urocanate hydratase 1 (UROC1), transcript variant 2, mRNA. (from RefSeq NM_001165974)
GPR6	3.8103	-0.70266	35.2604	0.000271364	0.00158244	G protein-coupled receptor 6 (GPR6), transcript variant 2, mRNA. (from RefSeq NM_005284)
FGG	3.77259	-0.281325	41.0499	0.000158147	0.00108407	fibrinogen gamma chain (FGG), transcript variant gamma-B, mRNA. (from RefSeq NM_021870)
SLC26A1	3.7687	2.85011	463.498	1e-08	2.54e-06	solute carrier family 26 member 1 (SLC26A1), transcript variant 3, mRNA. (from RefSeq NM_213613)
CNGA1	3.65361	2.53064	33.1517	0.000336481	0.00187196	cyclic nucleotide gated channel subunit alpha 1 (CNGA1), transcript variant 2, mRNA. (from RefSeq NM_000087)
FABP1	3.62634	7.55159	140.861	1.37e-06	4.27e-05	fatty acid binding protein 1 (FABP1), mRNA. (from RefSeq NM_001443)
ABCG8	3.55728	2.85851	42.4476	0.000140169	0.000990503	ATP binding cassette subfamily G member 8 (ABCG8), transcript variant 1, mRNA. (from RefSeq NM_022437)
ACMSD	3.48122	4.24877	541.884	5.2e-09	1.88e-06	aminocarboxymuconate semialdehyde decarboxylase (ACMSD), transcript variant 2, mRNA. (from RefSeq NM_001307983)
SV2B	3.41661	2.65358	79.1717	1.35e-05	0.000188484	synaptic vesicle glycoprotein 2B (SV2B), transcript variant 10, mRNA. (from RefSeq NM_001323039)
BANF2	3.39358	-2.6164	10.6802	0.0104561	0.0284511	barrier to autointegration factor 2 (BANF2), transcript variant 1, mRNA. (from RefSeq NM_178477)
DDC	3.38863	4.49019	160.57	8.05e-07	3.17e-05	dopa decarboxylase (DDC), transcript variant 7, mRNA. (from RefSeq NM_001242890)
CDX2	3.35281	-2.31228	16.3373	0.00327076	0.0110167	caudal type homeobox 2 (CDX2), transcript variant 2, mRNA. (from RefSeq NM_001354700)
HPX	3.32991	7.58716	21.7974	0.00135658	0.00545566	hemopexin (HPX), mRNA. (from RefSeq NM_000613)
C8A	3.25707	2.8086	23.4511	0.00107361	0.00454344	complement C8 alpha chain (C8A), mRNA. (from RefSeq NM_000562)
SYCP1	3.24494	-2.32418	22.7047	0.00119126	0.00492907	synaptonemal complex protein 1 (SYCP1), transcript variant 3, mRNA. (from RefSeq NM_001282542)
DPYS	3.24274	9.28572	115.575	3.03e-06	6.97e-05	dihydropyrimidinase (DPYS), mRNA. (from RefSeq NM_001385)
ALDH8A1	3.23289	8.09336	193.788	3.74e-07	2.04e-05	aldehyde dehydrogenase 8 family member A1 (ALDH8A1), transcript variant 3, mRNA. (from RefSeq NM_001193480)
IGLON5	3.12774	-2.40168	10.1486	0.0118843	0.0317021	IgLON family member 5 (IGLON5), mRNA. (from RefSeq NM_001101372)
MME	3.12053	7.88341	470.447	9.41e-09	2.43e-06	membrane metalloendopeptidase (MME), transcript variant 2b, mRNA. (from RefSeq NM_007289)
CER1	3.11875	-2.43472	12.6354	0.00673836	0.0199519	cerberus 1, DAN family BMP antagonist (CER1), mRNA. (from RefSeq NM_005454)
DIO1	3.10958	-0.370437	50.112	7.64e-05	0.000631764	iodothyronine deiodinase 1 (DIO1), transcript variant 5, mRNA. (from RefSeq NM_001324316)
AFP	3.06734	-1.3292	12.4368	0.00703136	0.0206244	alpha fetoprotein (AFP), transcript variant 2, mRNA. (from RefSeq NM_001354717)
ABCG5	3.02501	2.36986	89.8882	8.2e-06	0.000134207	ATP binding cassette subfamily G member 5 (ABCG5), mRNA. (from RefSeq NM_022436)
PPP1R16B	2.99262	3.66309	207.779	2.81e-07	1.72e-05	protein phosphatase 1 regulatory subunit 16B (PPP1R16B), transcript variant 2, mRNA. (from RefSeq NM_001172735)
ADRA1B	2.96692	1.47914	54.1265	5.74e-05	0.000513711	adrenoceptor alpha 1B (ADRA1B), mRNA. (from RefSeq NM_000679)
ITIH2	2.95768	1.89332	137.774	1.5e-06	4.51e-05	inter-alpha-trypsin inhibitor heavy chain 2 (ITIH2), mRNA. (from RefSeq NM_002216)
ABAT	2.93461	7.72739	667.921	2.16e-09	1.54e-06	4-aminobutyrate aminotransferase (ABAT), transcript variant 3, mRNA. (from RefSeq NM_001127448)
PROM2	2.88143	1.13979	19.9279	0.00179688	0.0068425	prominin 2 (PROM2), transcript variant 3, mRNA. (from RefSeq NM_144707)
SLC13A3	2.87588	-0.082053	64.5698	2.95e-05	0.000325825	solute carrier family 13 member 3 (SLC13A3), transcript variant 3, mRNA. (from RefSeq NM_001193339)
SLC12A1	2.85144	4.62611	204.658	2.99e-07	1.79e-05	solute carrier family 12 member 1 (SLC12A1), transcript variant 2, mRNA. (from RefSeq NM_001184832)
AKR1D1	2.82637	-2.06221	8.63051	0.0175404	0.0438787	aldo-keto reductase family 1 member D1 (AKR1D1), transcript variant 2, mRNA. (from RefSeq NM_001190906)
ABCC2	2.76519	9.18607	267.172	9.95e-08	9.88e-06	ATP binding cassette subfamily C member 2 (ABCC2), mRNA. (from RefSeq NM_000392)
EPCAM	2.75803	-0.393326	21.4744	0.0014222	0.00566593	epithelial cell adhesion molecule (EPCAM), mRNA. (from RefSeq NM_002354)
DNASE1	2.7536	0.0342267	39.4296	0.000182701	0.0011941	deoxyribonuclease 1 (DNASE1), transcript variant 1, mRNA. (from RefSeq NM_005223)
SLC22A6	2.75215	4.90899	309.939	5.37e-08	7.1e-06	solute carrier family 22 member 6 (SLC22A6), transcript variant 3, mRNA. (from RefSeq NM_153277)
SLC47A2	2.73111	1.97461	53.4201	6.03e-05	0.000533097	solute carrier family 47 member 2 (SLC47A2), transcript variant 5, non-coding RNA. (from RefSeq NR_135625)
AQP9	2.72742	-2.0893	9.39199	0.0143621	0.0370978	aquaporin 9 (AQP9), transcript variant 2, mRNA. (from RefSeq NM_001320635)
MIOX	2.72272	5.63633	254.127	1.22e-07	1.06e-05	myo-inositol oxygenase (MIOX), mRNA. (from RefSeq NM_017584)
AMBP	2.70222	4.51754	49.082	8.25e-05	0.000664899	alpha-1-microglobulin/bikunin precursor (AMBP), mRNA. (from RefSeq NM_001633)
SLC51A	2.68388	8.13174	288.885	7.2e-08	8.4e-06	solute carrier family 51 alpha subunit (SLC51A), mRNA. (from RefSeq NM_152672)
COL8A1	2.65214	1.00358	33.886	0.000311812	0.00176107	collagen type VIII alpha 1 chain (COL8A1), transcript variant 2, mRNA. (from RefSeq NM_020351)
GGACT	2.6259	6.89432	346.584	3.38e-08	5.4e-06	gamma-glutamylamine cyclotransferase (GGACT), transcript variant 2, mRNA. (from RefSeq NM_001195087)
OCA2	2.61616	1.61655	21.6153	0.0013931	0.00557266	OCA2 melanosomal transmembrane protein (OCA2), transcript variant 1, mRNA. (from RefSeq NM_000275)
SLC16A9	2.61275	4.51647	798.292	1.02e-09	1.25e-06	solute carrier family 16 member 9 (SLC16A9), transcript variant 1, mRNA. (from RefSeq NM_194298)
ARL14	2.60266	-1.65205	9.72855	0.0131875	0.0345511	ADP ribosylation factor like GTPase 14 (ARL14), mRNA. (from RefSeq NM_025047)
HAO1	2.57237	0.817059	53.3001	6.08e-05	0.0005355	hydroxyacid oxidase 1 (HAO1), mRNA. (from RefSeq NM_017545)
COL4A4	2.55998	4.7389	28.6641	0.000553437	0.00272934	collagen type IV alpha 4 chain (COL4A4), mRNA. (from RefSeq NM_000092)
SGK1	2.52423	8.89037	279.728	8.22e-08	8.74e-06	serum/glucocorticoid regulated kinase 1 (SGK1), transcript variant 5, mRNA. (from RefSeq NM_001291995)
CCDC89	2.40818	1.9359	139.198	1.44e-06	4.41e-05	coiled-coil domain containing 89 (CCDC89), mRNA. (from RefSeq NM_152723)
FGB	2.40784	7.58031	123.24	2.34e-06	5.91e-05	fibrinogen beta chain (FGB), transcript variant 1, mRNA. (from RefSeq NM_005141)
SLC25A47	2.39653	1.83691	126.595	2.1e-06	5.55e-05	solute carrier family 25 member 47 (SLC25A47), transcript variant 2, mRNA. (from RefSeq NM_001350877)
PAQR9	2.36305	3.78754	29.3984	0.000508073	0.00255864	progestin and adipoQ receptor family member 9 (PAQR9), mRNA. (from RefSeq NM_198504)
PIGZ	2.35914	1.046	48.4295	8.67e-05	0.000687004	phosphatidylinositol glycan anchor biosynthesis class Z (PIGZ), mRNA. (from RefSeq NM_025163)
PPDPFL	2.34966	-0.578863	9.82151	0.0128843	0.0338537	pancreatic progenitor cell differentiation and proliferation factor like (PPDPFL), transcript variant 4, mRNA. (from RefSeq NM_001256598)
GLYATL3	2.31888	3.59087	113.744	3.23e-06	7.29e-05	glycine-N-acyltransferase like 3 (GLYATL3), mRNA. (from RefSeq NM_001010904)
GPT2	2.31789	6.24903	237.119	1.63e-07	1.28e-05	glutamic--pyruvic transaminase 2 (GPT2), transcript variant 2, mRNA. (from RefSeq NM_001142466)
CPS1	2.3085	0.938517	8.47025	0.0183177	0.045554	carbamoyl-phosphate synthase 1 (CPS1), transcript variant 3, non-coding RNA. (from RefSeq NR_163592)
SLC15A1	2.29446	-1.84485	11.5715	0.00850874	0.0240566	solute carrier family 15 member 1 (SLC15A1), mRNA. (from RefSeq NM_005073)
SLC43A2	2.27824	4.3638	111.329	3.52e-06	7.75e-05	solute carrier family 43 member 2 (SLC43A2), transcript variant 3, mRNA. (from RefSeq NM_001284499)
SLC13A2	2.27494	1.56565	20.4962	0.00164643	0.00637986	solute carrier family 13 member 2 (SLC13A2), transcript variant 2, mRNA. (from RefSeq NM_003984)
MYO16	2.2706	4.23018	50.8318	7.25e-05	0.000609013	myosin XVI (MYO16), transcript variant 1, mRNA. (from RefSeq NM_001198950)
NR0B2	2.24859	0.357371	58.8196	4.2e-05	0.000410594	nuclear receptor subfamily 0 group B member 2 (NR0B2), mRNA. (from RefSeq NM_021969)
AOC1	2.2147	0.426356	23.5748	0.00105553	0.00448758	amine oxidase copper containing 1 (AOC1), transcript variant 1, mRNA. (from RefSeq NM_001272072)
FZD5	2.21433	3.14185	55.2197	5.32e-05	0.000485847	frizzled class receptor 5 (FZD5), mRNA. (from RefSeq NM_003468)
SLC13A1	2.19176	0.0785272	26.8586	0.000688213	0.00322685	solute carrier family 13 member 1 (SLC13A1), transcript variant 1, mRNA. (from RefSeq NM_022444)
RAPGEF4	2.18738	4.88233	23.2198	0.00110847	0.00466106	Rap guanine nucleotide exchange factor 4 (RAPGEF4), transcript variant 5, mRNA. (from RefSeq NM_001282901)
SLC6A3	2.18573	0.68736	72.948	1.85e-05	0.000232399	solute carrier family 6 member 3 (SLC6A3), mRNA. (from RefSeq NM_001044)
DPEP1	2.17538	8.15812	78.1762	1.41e-05	0.000194463	dipeptidase 1 (DPEP1), transcript variant 1, mRNA. (from RefSeq NM_004413)
GOLT1A	2.16683	-0.230548	17.6614	0.0025963	0.00914081	golgi transport 1A (GOLT1A), mRNA. (from RefSeq NM_198447)
PSAT1	2.13917	8.21932	289.376	7.15e-08	8.4e-06	phosphoserine aminotransferase 1 (PSAT1), transcript variant 2, mRNA. (from RefSeq NM_021154)
F7	2.11312	3.45345	151.248	1.03e-06	3.59e-05	coagulation factor VII (F7), transcript variant 1, mRNA. (from RefSeq NM_000131)
CCDC86	2.10748	3.79388	276.476	8.63e-08	9.09e-06	coiled-coil domain containing 86 (CCDC86), mRNA. (from RefSeq NM_024098)
UCP2	2.10154	3.25969	222.625	2.11e-07	1.46e-05	uncoupling protein 2 (UCP2), mRNA. (from RefSeq NM_003355)
SLC6A13	2.09851	5.59554	770.486	1.18e-09	1.25e-06	solute carrier family 6 member 13 (SLC6A13), transcript variant 3, mRNA. (from RefSeq NM_001243392)
APOM	2.0948	3.04064	160.978	7.96e-07	3.17e-05	apolipoprotein M (APOM), transcript variant 1, mRNA. (from RefSeq NM_019101)
SLC2A5	2.07704	7.47202	477.553	8.84e-09	2.39e-06	solute carrier family 2 member 5 (SLC2A5), transcript variant 2, mRNA. (from RefSeq NM_001135585)
FGF1	2.06859	6.20127	114.552	3.14e-06	7.13e-05	fibroblast growth factor 1 (FGF1), transcript variant 3, mRNA. (from RefSeq NM_033137)
BEND4	2.0266	0.845317	24.0058	0.000995386	0.00430097	BEN domain containing 4 (BEND4), transcript variant 2, mRNA. (from RefSeq NM_001159547)
TRAPPC3L	2.01934	-1.76002	8.6472	0.0174619	0.0437232	trafficking protein particle complex 3 like (TRAPPC3L), mRNA. (from RefSeq NM_001139444)
PANK1	2.01165	6.97395	223.434	2.08e-07	1.46e-05	pantothenate kinase 1 (PANK1), transcript variant beta, mRNA. (from RefSeq NM_148978)
CASQ2	2.00855	-0.878337	11.4238	0.00879812	0.0246696	calsequestrin 2 (CASQ2), mRNA. (from RefSeq NM_001232)
DPP4	2.00293	11.8382	254.558	1.22e-07	1.06e-05	dipeptidyl peptidase 4 (DPP4), mRNA. (from RefSeq NM_001935)
ANG	2.00021	3.28121	39.3195	0.000184533	0.00119742	angiogenin (ANG), transcript variant 2, mRNA. (from RefSeq NM_001097577)
TYRO3	-2.01677	3.03115	65.111	2.86e-05	0.000318582	TYRO3 protein tyrosine kinase (TYRO3), transcript variant 1, mRNA. (from RefSeq NM_006293)
SPARC	-2.02033	11.9609	245.459	1.41e-07	1.17e-05	secreted protein acidic and cysteine rich (SPARC), transcript variant 1, mRNA. (from RefSeq NM_003118)
IRF4	-2.02273	0.699306	21.4799	0.00142105	0.00566593	interferon regulatory factor 4 (IRF4), transcript variant 4, non-coding RNA. (from RefSeq NR_046000)
ABCA4	-2.03229	3.61433	147.461	1.14e-06	3.78e-05	ATP binding cassette subfamily A member 4 (ABCA4), mRNA. (from RefSeq NM_000350)
DUOXA2	-2.03249	0.694715	23.6641	0.00104271	0.00444579	dual oxidase maturation factor 2 (DUOXA2), mRNA. (from RefSeq NM_207581)
PPP1R3D	-2.03259	0.682338	57.1477	4.68e-05	0.000442788	protein phosphatase 1 regulatory subunit 3D (PPP1R3D), mRNA. (from RefSeq NM_006242)
MAP4K1	-2.03597	5.08699	131.492	1.81e-06	5.04e-05	mitogen-activated protein kinase kinase kinase kinase 1 (MAP4K1), transcript variant 1, mRNA. (from RefSeq NM_001042600)
OTOF	-2.03997	0.529253	23.2066	0.00111051	0.00466632	otoferlin (OTOF), transcript variant 3, mRNA. (from RefSeq NM_194322)
PRKAR1B	-2.04616	5.5992	238.001	1.6e-07	1.27e-05	protein kinase cAMP-dependent type I regulatory subunit beta (PRKAR1B), transcript variant 2, mRNA. (from RefSeq NM_002735)
SLC27A3	-2.04777	0.614413	50.9439	7.19e-05	0.000605346	solute carrier family 27 member 3 (SLC27A3), transcript variant 3, non-coding RNA. (from RefSeq NR_145826)
KCNB2	-2.0523	0.263287	49.1761	8.19e-05	0.000662587	potassium voltage-gated channel subfamily B member 2 (KCNB2), mRNA. (from RefSeq NM_004770)
PLOD1	-2.05432	8.28751	913.686	5.76e-10	1.25e-06	procollagen-lysine,2-oxoglutarate 5-dioxygenase 1 (PLOD1), transcript variant 1, mRNA. (from RefSeq NM_001316320)
SBSPON	-2.0605	-2.04931	8.2822	0.0192852	0.0475635	somatomedin B and thrombospondin type 1 domain containing (SBSPON), mRNA. (from RefSeq NM_153225)
SLC41A2	-2.06914	6.56236	168.275	6.65e-07	2.86e-05	solute carrier family 41 member 2 (SLC41A2), transcript variant 1, mRNA. (from RefSeq NM_032148)
TREH	-2.0724	4.20132	15.9125	0.00353211	0.0117331	trehalase (TREH), transcript variant 2, mRNA. (from RefSeq NM_001301065)
COLQ	-2.07321	-2.34468	8.1437	0.0200389	0.049026	collagen like tail subunit of asymmetric acetylcholinesterase (COLQ), transcript variant III, mRNA. (from RefSeq NM_080539)
VEGFA	-2.07357	7.72634	779.434	1.13e-09	1.25e-06	vascular endothelial growth factor A (VEGFA), transcript variant 10, mRNA. (from RefSeq NM_001287044)
ENPP2	-2.0738	4.20095	75.742	1.6e-05	0.000211976	ectonucleotide pyrophosphatase/phosphodiesterase 2 (ENPP2), transcript variant 2, mRNA. (from RefSeq NM_001040092)
KLHDC8A	-2.08346	0.0928885	38.7055	0.000195189	0.00124879	kelch domain containing 8A (KLHDC8A), transcript variant 1, mRNA. (from RefSeq NM_001271863)
CTSS	-2.08513	5.70988	215.52	2.41e-07	1.57e-05	cathepsin S (CTSS), transcript variant 2, mRNA. (from RefSeq NM_001199739)
ABCA12	-2.08627	-0.724623	18.5998	0.00222062	0.00805408	ATP binding cassette subfamily A member 12 (ABCA12), transcript variant 2, mRNA. (from RefSeq NM_015657)
LYG1	-2.08641	3.37914	47.3424	9.42e-05	0.000730726	lysozyme g1 (LYG1), transcript variant 2, mRNA. (from RefSeq NM_174898)
FHIT	-2.10811	-0.0245543	46.6978	9.91e-05	0.000756559	fragile histidine triad diadenosine triphosphatase (FHIT), transcript variant 6, non-coding RNA. (from RefSeq NR_135491)
COL5A3	-2.11443	-2.35158	11.7653	0.0081467	0.0232094	collagen type V alpha 3 chain (COL5A3), mRNA. (from RefSeq NM_015719)
MACC1	-2.12601	0.103354	33.4185	0.000327248	0.00182572	MET transcriptional regulator MACC1 (MACC1), mRNA. (from RefSeq NM_182762)
CPE	-2.1282	2.29582	9.94115	0.0125068	0.0330588	carboxypeptidase E (CPE), mRNA. (from RefSeq NM_001873)
P3H2	-2.13199	-1.99888	13.2475	0.00592583	0.0179583	prolyl 3-hydroxylase 2 (P3H2), transcript variant 2, mRNA. (from RefSeq NM_001134418)
ABCG4	-2.14797	3.71685	36.5299	0.000239618	0.00144965	ATP binding cassette subfamily G member 4 (ABCG4), transcript variant 2, mRNA. (from RefSeq NM_001142505)
TRAF3IP2	-2.15069	7.54425	185.561	4.46e-07	2.23e-05	TRAF3 interacting protein 2 (TRAF3IP2), transcript variant 5, mRNA. (from RefSeq NM_001164283)
CHI3L1	-2.15751	6.01951	29.4917	0.000502644	0.00253775	chitinase 3 like 1 (CHI3L1), mRNA. (from RefSeq NM_001276)
NAV1	-2.16151	0.150087	52.8279	6.28e-05	0.000548792	neuron navigator 1 (NAV1), transcript variant 2, mRNA. (from RefSeq NM_001167738)
TMEM198	-2.16696	0.547685	49.1708	8.19e-05	0.000662587	transmembrane protein 198 (TMEM198), transcript variant 2, mRNA. (from RefSeq NM_001005209)
VIPR2	-2.18678	-0.698845	22.6639	0.00119814	0.00495066	vasoactive intestinal peptide receptor 2 (VIPR2), transcript variant 4, mRNA. (from RefSeq NM_001308259)
SPAG17	-2.18795	1.47862	47.3816	9.39e-05	0.000729461	sperm associated antigen 17 (SPAG17), mRNA. (from RefSeq NM_206996)
ARHGAP15	-2.19172	-1.97181	11.3698	0.00890714	0.0249001	Rho GTPase activating protein 15 (ARHGAP15), mRNA. (from RefSeq NM_018460)
ITGAL	-2.19363	1.38611	69.6951	2.2e-05	0.000263078	integrin subunit alpha L (ITGAL), transcript variant 1, mRNA. (from RefSeq NM_002209)
FIBCD1	-2.2107	-1.87414	12.2545	0.00731435	0.0212963	fibrinogen C domain containing 1 (FIBCD1), transcript variant 1, mRNA. (from RefSeq NM_032843)
NME4	-2.22018	0.475293	10.5005	0.0109136	0.0294294	NME/NM23 nucleoside diphosphate kinase 4 (NME4), transcript variant 7, mRNA. (from RefSeq NM_001286440)
DYDC1	-2.22369	-1.72759	14.2528	0.00483819	0.0151871	DPY30 domain containing 1 (DYDC1), transcript variant 5, mRNA. (from RefSeq NM_001370157)
FAM169A	-2.22834	6.95541	193.466	3.76e-07	2.04e-05	family with sequence similarity 169 member A (FAM169A), transcript variant 2, non-coding RNA. (from RefSeq NR_046462)
WFDC5	-2.24292	-2.56453	9.4651	0.0140962	0.036514	WAP four-disulfide core domain 5 (WFDC5), mRNA. (from RefSeq NM_145652)
EPHX4	-2.24299	3.54566	126.965	2.08e-06	5.52e-05	epoxide hydrolase 4 (EPHX4), mRNA. (from RefSeq NM_173567)
SLC8A3	-2.24797	1.3262	104.6	4.51e-06	8.95e-05	solute carrier family 8 member A3 (SLC8A3), transcript variant b, mRNA. (from RefSeq NM_058240)
DLX1	-2.25089	0.13972	41.9815	0.000145869	0.00101981	distal-less homeobox 1 (DLX1), transcript variant 2, mRNA. (from RefSeq NM_001038493)
RLBP1	-2.25493	0.786526	19.391	0.00195496	0.00729968	retinaldehyde binding protein 1 (RLBP1), mRNA. (from RefSeq NM_000326)
RNF157	-2.25831	3.01169	361.158	2.84e-08	4.97e-06	ring finger protein 157 (RNF157), transcript variant 2, mRNA. (from RefSeq NM_001330501)
CTIF	-2.2851	5.97069	552.977	4.78e-09	1.83e-06	cap binding complex dependent translation initiation factor (CTIF), transcript variant 2, mRNA. (from RefSeq NM_001142397)
BNIP3L	-2.2959	7.78227	640.908	2.57e-09	1.54e-06	BCL2 interacting protein 3 like (BNIP3L), transcript variant 2, mRNA. (from RefSeq NM_001330491)
PRRX1	-2.29914	3.36181	124.541	2.25e-06	5.75e-05	paired related homeobox 1 (PRRX1), transcript variant pmx-1b, mRNA. (from RefSeq NM_022716)
ARHGAP20	-2.30787	5.39877	166.781	6.9e-07	2.94e-05	Rho GTPase activating protein 20 (ARHGAP20), transcript variant 3, mRNA. (from RefSeq NM_001258416)
ZMYND10	-2.31583	3.41916	226.829	1.96e-07	1.43e-05	zinc finger MYND-type containing 10 (ZMYND10), transcript variant 2, mRNA. (from RefSeq NM_001308379)
WDR64	-2.31952	-2.74338	8.76545	0.0169177	0.0425714	WD repeat domain 64 (WDR64), mRNA. (from RefSeq NM_001367482)
BMP2	-2.32	1.69921	135.262	1.61e-06	4.68e-05	bone morphogenetic protein 2 (BMP2), mRNA. (from RefSeq NM_001200)
GFPT2	-2.32716	5.37965	256.374	1.18e-07	1.06e-05	glutamine-fructose-6-phosphate transaminase 2 (GFPT2), mRNA. (from RefSeq NM_005110)
TRAF1	-2.33452	-0.73123	25.4098	0.000826738	0.00370972	TNF receptor associated factor 1 (TRAF1), transcript variant 2, mRNA. (from RefSeq NM_001190945)
LDHA	-2.33929	9.82374	166.735	6.9e-07	2.94e-05	lactate dehydrogenase A (LDHA), transcript variant 3, mRNA. (from RefSeq NM_001165414)
ERN2	-2.34024	-2.21971	12.5286	0.00689408	0.0203219	endoplasmic reticulum to nucleus signaling 2 (ERN2), transcript variant 2, mRNA. (from RefSeq NM_001308220)
TMEM145	-2.34227	3.0301	85.6392	9.91e-06	0.000152359	transmembrane protein 145 (TMEM145), transcript variant 1, mRNA. (from RefSeq NM_001366910)
GPR137C	-2.35684	1.28713	81.8333	1.18e-05	0.000172008	G protein-coupled receptor 137C (GPR137C), transcript variant 1, mRNA. (from RefSeq NM_001353361)
MYLK2	-2.36123	-2.32649	8.49414	0.0181991	0.0453359	myosin light chain kinase 2 (MYLK2), mRNA. (from RefSeq NM_033118)
COLEC10	-2.37121	-1.96011	13.565	0.00555222	0.0169937	collectin subfamily member 10 (COLEC10), transcript variant 1, mRNA. (from RefSeq NM_006438)
TGM6	-2.37124	-1.29816	15.6225	0.00372546	0.0122602	transglutaminase 6 (TGM6), transcript variant 2, mRNA. (from RefSeq NM_001254734)
FAM162A	-2.37997	8.02516	857.046	7.54e-10	1.25e-06	family with sequence similarity 162 member A (FAM162A), mRNA. (from RefSeq NM_014367)
OBSCN	-2.38394	-0.749065	39.4261	0.000182758	0.0011941	obscurin, cytoskeletal calmodulin and titin-interacting RhoGEF (OBSCN), transcript variant IC, mRNA. (from RefSeq NM_001271223)
NFATC4	-2.3846	-0.643186	19.0159	0.00207571	0.00764734	nuclear factor of activated T cells 4 (NFATC4), transcript variant 8, mRNA. (from RefSeq NM_001363681)
EPOR	-2.38974	-0.813877	20.6435	0.00160999	0.00626518	erythropoietin receptor (EPOR), transcript variant 2, non-coding RNA. (from RefSeq NR_033663)
INPP5D	-2.39077	-0.00564822	38.6667	0.000195886	0.00125191	inositol polyphosphate-5-phosphatase D (INPP5D), transcript variant 1, mRNA. (from RefSeq NM_001017915)
LBP	-2.40155	2.71829	23.3735	0.00108516	0.00458246	lipopolysaccharide binding protein (LBP), mRNA. (from RefSeq NM_004139)
HOXD11	-2.40355	4.60226	267.472	9.9e-08	9.88e-06	homeobox D11 (HOXD11), mRNA. (from RefSeq NM_021192)
IRX3	-2.40699	2.3724	127.993	2.01e-06	5.47e-05	iroquois homeobox 3 (IRX3), mRNA. (from RefSeq NM_024336)
TRIM55	-2.40959	-0.596553	29.5158	0.000501253	0.00253179	tripartite motif containing 55 (TRIM55), transcript variant 1, mRNA. (from RefSeq NM_184085)
ABCB11	-2.40982	7.63131	54.8907	5.44e-05	0.000493426	ATP binding cassette subfamily B member 11 (ABCB11), mRNA. (from RefSeq NM_003742)
ADGRF1	-2.41056	3.30613	63.7624	3.09e-05	0.000334059	adhesion G protein-coupled receptor F1 (ADGRF1), transcript variant 2, mRNA. (from RefSeq NM_025048)
CSF3	-2.41147	4.77893	77.8575	1.44e-05	0.000196208	colony stimulating factor 3 (CSF3), transcript variant 3, mRNA. (from RefSeq NM_172220)
TERB2	-2.4145	-1.71198	21.3028	0.00145868	0.00578224	telomere repeat binding bouquet formation protein 2 (TERB2), mRNA. (from RefSeq NM_152448)
KCNK3	-2.41991	-1.28714	29.7382	0.000488639	0.00247934	potassium two pore domain channel subfamily K member 3 (KCNK3), mRNA. (from RefSeq NM_002246)
GPX2	-2.43142	3.298	140.291	1.39e-06	4.31e-05	glutathione peroxidase 2 (GPX2), transcript variant 4, non-coding RNA. (from RefSeq NR_138078)
TTC9	-2.44252	1.4913	169.401	6.47e-07	2.81e-05	tetratricopeptide repeat domain 9 (TTC9), mRNA. (from RefSeq NM_015351)
UBA7	-2.44676	2.56375	207.247	2.84e-07	1.73e-05	ubiquitin like modifier activating enzyme 7 (UBA7), mRNA. (from RefSeq NM_003335)
ADGRG1	-2.45763	7.30388	738.151	1.42e-09	1.3e-06	adhesion G protein-coupled receptor G1 (ADGRG1), transcript variant 27, mRNA. (from RefSeq NM_001370451)
RASGRF1	-2.46094	-2.32346	10.5751	0.0107208	0.0290146	Ras protein specific guanine nucleotide releasing factor 1 (RASGRF1), transcript variant 2, mRNA. (from RefSeq NM_153815)
MYPN	-2.46416	-1.81033	13.5856	0.00552903	0.0169366	myopalladin (MYPN), transcript variant 5, mRNA. (from RefSeq NM_001256268)
RBM24	-2.46861	-1.19747	12.7722	0.00654533	0.0194919	RNA binding motif protein 24 (RBM24), transcript variant 2, mRNA. (from RefSeq NM_153020)
SLC24A3	-2.47571	1.42149	64.0762	3.04e-05	0.000330576	solute carrier family 24 member 3 (SLC24A3), mRNA. (from RefSeq NM_020689)
SRMS	-2.50457	1.38156	85.7335	9.87e-06	0.000152172	src-related kinase lacking C-terminal regulatory tyrosine and N-terminal myristylation sites (SRMS), mRNA. (from RefSeq NM_080823)
WNT6	-2.50819	-1.95786	13.3529	0.00579848	0.0176083	Wnt family member 6 (WNT6), mRNA. (from RefSeq NM_006522)
GLT8D2	-2.51746	0.229855	58.5373	4.28e-05	0.000415405	glycosyltransferase 8 domain containing 2 (GLT8D2), transcript variant 2, mRNA. (from RefSeq NM_001316967)
OSTN	-2.51915	1.51106	64.312	2.99e-05	0.000328528	osteocrin (OSTN), mRNA. (from RefSeq NM_198184)
CGA	-2.52033	-2.02166	11.8549	0.00798573	0.0228878	glycoprotein hormones, alpha polypeptide (CGA), transcript variant 1, mRNA. (from RefSeq NM_001252383)
THBS4	-2.54583	-2.78131	8.52387	0.0180529	0.0449999	thrombospondin 4 (THBS4), transcript variant 4, mRNA. (from RefSeq NM_001306214)
BDKRB1	-2.55193	2.04387	83.5239	1.09e-05	0.000161817	bradykinin receptor B1 (BDKRB1), mRNA. (from RefSeq NM_000710)
ADAMTS16	-2.57054	-0.557909	39.5209	0.000181197	0.00118844	ADAM metallopeptidase with thrombospondin type 1 motif 16 (ADAMTS16), transcript variant 2, non-coding RNA. (from RefSeq NR_136935)
GP2	-2.57252	-1.33991	21.8645	0.00134341	0.00540818	glycoprotein 2 (GP2), transcript variant 3, mRNA. (from RefSeq NM_001007241)
MGAT4C	-2.57276	-1.19857	14.1476	0.00493967	0.0154203	MGAT4 family member C (MGAT4C), transcript variant 11, non-coding RNA. (from RefSeq NR_147093)
ZNF423	-2.58198	2.5094	30.8472	0.000431286	0.00226592	zinc finger protein 423 (ZNF423), transcript variant 2, mRNA. (from RefSeq NM_001271620)
LTBP1	-2.59145	3.24047	59.5589	4.01e-05	0.000395945	latent transforming growth factor beta binding protein 1 (LTBP1), transcript variant 2, mRNA. (from RefSeq NM_000627)
TMPRSS11F	-2.60655	-2.77969	8.93518	0.0161729	0.0410445	transmembrane serine protease 11F (TMPRSS11F), mRNA. (from RefSeq NM_207407)
TNNI1	-2.6153	-2.52936	9.98197	0.0123811	0.0328141	troponin I1, slow skeletal type (TNNI1), mRNA. (from RefSeq NM_003281)
ADAMTS13	-2.62453	2.18652	149.569	1.07e-06	3.67e-05	ADAM metallopeptidase with thrombospondin type 1 motif 13 (ADAMTS13), transcript variant 3, mRNA. (from RefSeq NM_139026)
RARRES2	-2.63411	4.13492	46.1309	0.00010358	0.00078013	retinoic acid receptor responder 2 (RARRES2), mRNA. (from RefSeq NM_002889)
CRYAB	-2.65635	-1.5163	27.1847	0.000661093	0.00313177	crystallin alpha B (CRYAB), transcript variant 4, mRNA. (from RefSeq NM_001330379)
FSTL3	-2.66558	1.50349	95.5078	6.46e-06	0.000114011	follistatin like 3 (FSTL3), mRNA. (from RefSeq NM_005860)
KCNK13	-2.6718	3.72827	22.8355	0.00116953	0.00485436	potassium two pore domain channel subfamily K member 13 (KCNK13), mRNA. (from RefSeq NM_022054)
SERPINB5	-2.68156	2.19563	49.9891	7.71e-05	0.00063488	serpin family B member 5 (SERPINB5), mRNA. (from RefSeq NM_002639)
DLG4	-2.68325	0.0467779	17.5074	0.00266528	0.00934082	discs large MAGUK scaffold protein 4 (DLG4), transcript variant 6, mRNA. (from RefSeq NM_001321077)
SH3BGR	-2.71547	-1.72997	25.7738	0.000788913	0.00358734	SH3 domain binding glutamate rich protein (SH3BGR), transcript variant 1, mRNA. (from RefSeq NM_007341)
CAPN8	-2.71952	1.65586	110.776	3.59e-06	7.83e-05	calpain 8 (CAPN8), mRNA. (from RefSeq NM_001143962)
TCIM	-2.72707	2.58228	87.9855	8.91e-06	0.000142398	transcriptional and immune response regulator (TCIM), mRNA. (from RefSeq NM_020130)
PTPRZ1	-2.73341	-0.642351	23.4315	0.00107651	0.00455161	protein tyrosine phosphatase receptor type Z1 (PTPRZ1), transcript variant 3, mRNA. (from RefSeq NM_001206839)
SMC1B	-2.73439	-2.66893	12.5894	0.00680492	0.0201039	structural maintenance of chromosomes 1B (SMC1B), transcript variant 2, mRNA. (from RefSeq NM_001291501)
FXYD6	-2.75545	2.23689	218.64	2.28e-07	1.53e-05	FXYD domain containing ion transport regulator 6 (FXYD6), transcript variant 2, mRNA. (from RefSeq NM_001164831)
AGBL4	-2.76093	0.500701	83.5118	1.09e-05	0.000161817	ATP/GTP binding protein like 4 (AGBL4), transcript variant 5, non-coding RNA. (from RefSeq NR_136623)
CDA	-2.76187	7.23589	287.53	7.34e-08	8.4e-06	cytidine deaminase (CDA), mRNA. (from RefSeq NM_001785)
ADAMTSL1	-2.76402	-2.70124	9.91992	0.0125728	0.0332037	ADAMTS like 1 (ADAMTSL1), transcript variant 4, mRNA. (from RefSeq NM_001040272)
RGS8	-2.76647	1.58237	63.0401	3.23e-05	0.000342928	regulator of G protein signaling 8 (RGS8), transcript variant 3, mRNA. (from RefSeq NM_001369564)
COL11A1	-2.77168	1.86372	63.6742	3.11e-05	0.000334968	collagen type XI alpha 1 chain (COL11A1), transcript variant C, mRNA. (from RefSeq NM_080630)
SFRP2	-2.77261	4.32413	121.809	2.45e-06	6.06e-05	secreted frizzled related protein 2 (SFRP2), mRNA. (from RefSeq NM_003013)
UCN	-2.7826	-2.93925	8.81857	0.0166801	0.042125	urocortin (UCN), mRNA. (from RefSeq NM_003353)
C1R	-2.78716	6.1017	97.5373	5.94e-06	0.000107158	complement C1r (C1R), transcript variant 2, mRNA. (from RefSeq NM_001354346)
HK1	-2.79361	6.80597	777.123	1.14e-09	1.25e-06	hexokinase 1 (HK1), transcript variant 9, mRNA. (from RefSeq NM_001322367)
PDZD4	-2.79447	0.733161	109.762	3.72e-06	7.92e-05	PDZ domain containing 4 (PDZD4), transcript variant 4, mRNA. (from RefSeq NM_001303514)
TMEM45A	-2.82313	4.88301	115.818	3e-06	6.95e-05	transmembrane protein 45A (TMEM45A), transcript variant 1, mRNA. (from RefSeq NM_001363876)
COL22A1	-2.82904	-2.63145	11.019	0.00965662	0.0267023	collagen type XXII alpha 1 chain (COL22A1), mRNA. (from RefSeq NM_152888)
KCNAB2	-2.84195	4.95358	628.843	2.78e-09	1.54e-06	potassium voltage-gated channel subfamily A regulatory beta subunit 2 (KCNAB2), transcript variant 6, mRNA. (from RefSeq NM_001199863)
CRYBA1	-2.86271	1.10237	40.6109	0.000164374	0.00111326	crystallin beta A1 (CRYBA1), mRNA. (from RefSeq NM_005208)
NCF4	-2.87536	-1.48281	32.9279	0.000344473	0.00190662	neutrophil cytosolic factor 4 (NCF4), transcript variant 1, mRNA. (from RefSeq NM_000631)
REEP1	-2.89502	-0.768874	25.5259	0.000814442	0.00367116	receptor accessory protein 1 (REEP1), transcript variant 1, mRNA. (from RefSeq NM_001164730)
LOXL2	-2.90949	2.6957	251.357	1.28e-07	1.09e-05	lysyl oxidase like 2 (LOXL2), mRNA. (from RefSeq NM_002318)
PLA2G7	-2.91351	3.57121	126.252	2.13e-06	5.57e-05	phospholipase A2 group VII (PLA2G7), transcript variant 2, mRNA. (from RefSeq NM_001168357)
PTX3	-2.91468	5.23685	59.7226	3.96e-05	0.000392516	pentraxin 3 (PTX3), mRNA. (from RefSeq NM_002852)
CCR7	-2.93976	2.17325	280.258	8.16e-08	8.74e-06	C-C motif chemokine receptor 7 (CCR7), transcript variant 2, mRNA. (from RefSeq NM_001301714)
RRAD	-2.94147	-1.02491	19.0291	0.0020713	0.00763584	RRAD, Ras related glycolysis inhibitor and calcium channel regulator (RRAD), transcript variant 2, mRNA. (from RefSeq NM_004165)
ROBO1	-2.94279	-1.97492	12.4544	0.00700476	0.0205768	roundabout guidance receptor 1 (ROBO1), transcript variant 4, mRNA. (from RefSeq NM_001145845)
SPINT1	-2.94351	4.6947	423.692	1.46e-08	3.3e-06	serine peptidase inhibitor, Kunitz type 1 (SPINT1), transcript variant 1, mRNA. (from RefSeq NM_181642)
PRRX2	-2.9576	-1.74521	22.018	0.00131389	0.00532132	paired related homeobox 2 (PRRX2), mRNA. (from RefSeq NM_016307)
HGFAC	-2.9667	5.77013	98.5694	5.7e-06	0.000105511	HGF activator (HGFAC), transcript variant 1, mRNA. (from RefSeq NM_001297439)
MMD2	-2.96893	-1.29542	37.832	0.000211689	0.0013248	monocyte to macrophage differentiation associated 2 (MMD2), transcript variant 2, mRNA. (from RefSeq NM_198403)
TLX2	-2.97259	-2.8176	9.50105	0.0139677	0.0362442	T cell leukemia homeobox 2 (TLX2), mRNA. (from RefSeq NM_016170)
ANTXR1	-2.98221	-1.76553	28.9894	0.000532748	0.0026526	ANTXR cell adhesion molecule 1 (ANTXR1), transcript variant 2, mRNA. (from RefSeq NM_053034)
KLK5	-3.00587	-1.73997	21.6543	0.00138518	0.00555289	kallikrein related peptidase 5 (KLK5), transcript variant 3, mRNA. (from RefSeq NM_001077492)
ALDH1L2	-3.01121	4.90199	353.985	3.09e-08	5.25e-06	uncharacterized LOC414300 (LOC414300), long non-coding RNA. (from RefSeq NR_121211)
PFKP	-3.05151	6.17113	197.344	3.47e-07	2.03e-05	phosphofructokinase, platelet (PFKP), transcript variant 10, mRNA. (from RefSeq NM_001323074)
CCDC102B	-3.05341	-2.05955	13.3661	0.00578273	0.0175682	coiled-coil domain containing 102B (CCDC102B), transcript variant 2, mRNA. (from RefSeq NM_024781)
TSPO	-3.05926	3.01216	126.846	2.09e-06	5.52e-05	translocator protein (TSPO), transcript variant 3, mRNA. (from RefSeq NM_001256530)
MAP1B	-3.07763	0.284012	54.5283	5.58e-05	0.000502739	microtubule associated protein 1B (MAP1B), transcript variant 1, mRNA. (from RefSeq NM_005909)
AQP8	-3.08313	-1.67145	11.6013	0.00845178	0.0239069	aquaporin 8 (AQP8), mRNA. (from RefSeq NM_001169)
MYO3B	-3.09637	4.14907	40.4107	0.000167314	0.00112425	myosin IIIB (MYO3B), transcript variant 1, mRNA. (from RefSeq NM_001083615)
UPK1A	-3.10766	-2.02482	15.3672	0.00390667	0.0127628	uroplakin 1A (UPK1A), transcript variant 1, mRNA. (from RefSeq NM_007000)
IL5RA	-3.13101	2.11197	60.812	3.7e-05	0.000376932	interleukin 5 receptor subunit alpha (IL5RA), transcript variant 5, mRNA. (from RefSeq NM_175727)
ANKRD37	-3.14095	1.48726	41.1293	0.000157052	0.00107921	ankyrin repeat domain 37 (ANKRD37), mRNA. (from RefSeq NM_181726)
SRL	-3.14469	1.93829	95.854	6.37e-06	0.00011273	sarcalumenin (SRL), transcript variant 3, mRNA. (from RefSeq NM_001323668)
CLEC1A	-3.14909	7.32399	64.2444	3.01e-05	0.00032883	C-type lectin domain family 1 member A (CLEC1A), transcript variant 3, mRNA. (from RefSeq NM_001297749)
LIMS2	-3.17468	4.39367	401.322	1.83e-08	3.73e-06	LIM zinc finger domain containing 2 (LIMS2), transcript variant 1, mRNA. (from RefSeq NM_001136037)
DUSP13	-3.18471	-3.02912	9.99743	0.0123339	0.0327036	dual specificity phosphatase 13 (DUSP13), transcript variant 2, mRNA. (from RefSeq NM_001007272)
LRP2BP	-3.1937	5.61994	152.307	9.97e-07	3.54e-05	LRP2 binding protein (LRP2BP), mRNA. (from RefSeq NM_018409)
SPAG6	-3.23277	1.13661	68.1616	2.4e-05	0.000281522	sperm associated antigen 6 (SPAG6), transcript variant 3, mRNA. (from RefSeq NM_001253854)
ST3GAL1	-3.28079	5.59675	397.392	1.91e-08	3.78e-06	ST3 beta-galactoside alpha-2,3-sialyltransferase 1 (ST3GAL1), transcript variant 1, mRNA. (from RefSeq NM_003033)
EFHC2	-3.30312	-0.645339	37.0696	0.00022752	0.00139418	EF-hand domain containing 2 (EFHC2), mRNA. (from RefSeq NM_025184)
ERO1A	-3.34386	8.68572	355.798	3.03e-08	5.22e-06	endoplasmic reticulum oxidoreductase 1 alpha (ERO1A), mRNA. (from RefSeq NM_014584)
LRRC23	-3.34547	-1.3018	22.076	0.00130296	0.00527927	leucine rich repeat containing 23 (LRRC23), transcript variant 2, mRNA. (from RefSeq NM_006992)
RAD21L1	-3.36517	-2.90126	9.82201	0.0128827	0.0338537	RAD21 cohesin complex component like 1 (RAD21L1), mRNA. (from RefSeq NM_001136566)
CCDC80	-3.36526	-3.38686	8.52788	0.0180333	0.0449605	coiled-coil domain containing 80 (CCDC80), transcript variant 2, mRNA. (from RefSeq NM_199512)
HAS1	-3.3702	-2.0243	18.7275	0.00217483	0.00792673	hyaluronan synthase 1 (HAS1), transcript variant 2, mRNA. (from RefSeq NM_001297436)
KANK3	-3.38653	4.32889	1033.58	3.42e-10	1.25e-06	KN motif and ankyrin repeat domains 3 (KANK3), mRNA. (from RefSeq NM_198471)
SLC6A4	-3.39487	1.31237	87.7317	9.02e-06	0.000142702	solute carrier family 6 member 4 (SLC6A4), mRNA. (from RefSeq NM_001045)
GPR37	-3.43167	3.17357	244.822	1.43e-07	1.17e-05	G protein-coupled receptor 37 (GPR37), mRNA. (from RefSeq NM_005302)
ZBTB16	-3.44867	1.78683	125.808	2.16e-06	5.62e-05	zinc finger and BTB domain containing 16 (ZBTB16), transcript variant 2, mRNA. (from RefSeq NM_001018011)
GJD3	-3.47313	0.637059	46.3209	0.000102035	0.000774373	gap junction protein delta 3 (GJD3), mRNA. (from RefSeq NM_152219)
CALML3	-3.51293	5.57944	60.8163	3.7e-05	0.000376932	calmodulin like 3 (CALML3), mRNA. (from RefSeq NM_005185)
LGR5	-3.51912	-0.314519	63.5016	3.14e-05	0.000337469	leucine rich repeat containing G protein-coupled receptor 5 (LGR5), transcript variant 2, mRNA. (from RefSeq NM_001277226)
BPIFB3	-3.53829	-2.81687	12.2501	0.00732144	0.0213072	BPI fold containing family B member 3 (BPIFB3), mRNA. (from RefSeq NM_182658)
KCNK2	-3.53852	4.30628	273.45	9.04e-08	9.35e-06	potassium two pore domain channel subfamily K member 2 (KCNK2), transcript variant 3, mRNA. (from RefSeq NM_001017425)
GPR61	-3.54156	-2.40639	12.5067	0.00692651	0.0203922	G protein-coupled receptor 61 (GPR61), mRNA. (from RefSeq NM_031936)
CPNE5	-3.55277	-0.851193	37.8332	0.000211666	0.0013248	copine 5 (CPNE5), transcript variant 5, mRNA. (from RefSeq NM_001314020)
FRY	-3.55914	3.41319	213.358	2.52e-07	1.61e-05	FRY microtubule binding protein (FRY), mRNA. (from RefSeq NM_023037)
THEMIS	-3.56119	2.48341	221.663	2.15e-07	1.48e-05	thymocyte selection associated (THEMIS), transcript variant 4, mRNA. (from RefSeq NM_001318531)
ZAR1L	-3.59877	-0.00885479	139.61	1.42e-06	4.37e-05	zygote arrest 1 like (ZAR1L), mRNA. (from RefSeq NM_001136571)
TMEM52B	-3.6067	3.7214	186.043	4.41e-07	2.23e-05	transmembrane protein 52B (TMEM52B), transcript variant 1, mRNA. (from RefSeq NM_153022)
S100A4	-3.61192	7.65491	475.038	9.04e-09	2.39e-06	teracts with PPFIBP1 in a calcium-dependent mode. (from UniProt P26447)
GPR37L1	-3.62545	1.46045	210.116	2.68e-07	1.68e-05	G protein-coupled receptor 37 like 1 (GPR37L1), mRNA. (from RefSeq NM_004767)
SNCB	-3.62591	0.0860561	41.7167	0.000149236	0.00103854	synuclein beta (SNCB), transcript variant 5, mRNA. (from RefSeq NM_001318036)
MMP12	-3.63269	-2.35408	15.2068	0.00402607	0.0130759	matrix metallopeptidase 12 (MMP12), mRNA. (from RefSeq NM_002426)
MMP1	-3.65183	1.01909	38.0545	0.000207327	0.00130678	matrix metallopeptidase 1 (MMP1), transcript variant 1, mRNA. (from RefSeq NM_002421)
TPM2	-3.67236	-3.22262	10.6017	0.010653	0.0288837	tropomyosin 2 (TPM2), transcript variant Tpm2.4, mRNA. (from RefSeq NM_001301227)
PCSK1	-3.6868	2.06344	218.041	2.3e-07	1.53e-05	proprotein convertase subtilisin/kexin type 1 (PCSK1), transcript variant 2, mRNA. (from RefSeq NM_001177875)
LRMDA	-3.69788	-1.97764	18.7939	0.00215151	0.00785609	leucine rich melanocyte differentiation associated (LRMDA), transcript variant 2, mRNA. (from RefSeq NM_032024)
DSCAML1	-3.72513	3.08094	222.63	2.11e-07	1.46e-05	DS cell adhesion molecule like 1 (DSCAML1), transcript variant 1, mRNA. (from RefSeq NM_020693)
ACAN	-3.72992	-2.67006	16.3377	0.00327052	0.0110167	aggrecan (ACAN), transcript variant 1, mRNA. (from RefSeq NM_001135)
NOS2	-3.74672	4.63778	41.6214	0.000150471	0.00104591	nitric oxide synthase 2 (NOS2), mRNA. (from RefSeq NM_000625)
STC1	-3.75675	7.71001	376.686	2.38e-08	4.44e-06	stanniocalcin 1 (STC1), mRNA. (from RefSeq NM_003155)
PRR16	-3.79702	-3.16967	13.3787	0.00576785	0.0175364	proline rich 16 (PRR16), transcript variant 4, mRNA. (from RefSeq NM_001308088)
POSTN	-3.81984	9.9353	34.593	0.00029014	0.00166474	periostin (POSTN), transcript variant 4, mRNA. (from RefSeq NM_001135936)
CXCR5	-3.84442	-0.0403699	83.6322	1.09e-05	0.000161817	C-X-C motif chemokine receptor 5 (CXCR5), transcript variant 1, mRNA. (from RefSeq NM_001716)
MYO15A	-3.84781	3.98188	65.7523	2.75e-05	0.000310383	myosin XVA (MYO15A), mRNA. (from RefSeq NM_016239)
ENO2	-3.92822	3.99242	553.194	4.77e-09	1.83e-06	enolase 2 (ENO2), mRNA. (from RefSeq NM_001975)
CYP1B1	-3.92917	7.51682	422.952	1.47e-08	3.3e-06	cytochrome P450 family 1 subfamily B member 1 (CYP1B1), mRNA. (from RefSeq NM_000104)
TNFRSF19	-3.9307	1.22858	39.7267	0.000177862	0.00117466	TNF receptor superfamily member 19 (TNFRSF19), transcript variant 5, mRNA. (from RefSeq NM_001354985)
SNX31	-4.00791	-0.0729371	105.123	4.42e-06	8.82e-05	sorting nexin 31 (SNX31), transcript variant 2, mRNA. (from RefSeq NM_001363720)
DRC7	-4.08168	-2.43618	17.4467	0.00269307	0.00942299	dynein regulatory complex subunit 7 (DRC7), transcript variant 3, mRNA. (from RefSeq NM_001289163)
TP63	-4.0912	-1.98764	16.9796	0.0029195	0.0100643	tumor protein p63 (TP63), transcript variant 9, mRNA. (from RefSeq NM_001329146)
IGFBP3	-4.10601	6.74799	101.477	5.08e-06	9.69e-05	insulin like growth factor binding protein 3 (IGFBP3), transcript variant 2, mRNA. (from RefSeq NM_000598)
PTGES	-4.11743	8.27486	215.995	2.39e-07	1.56e-05	prostaglandin E synthase (PTGES), mRNA. (from RefSeq NM_004878)
GRM5	-4.24225	0.52058	107.733	4.01e-06	8.31e-05	glutamate metabotropic receptor 5 (GRM5), transcript variant a, mRNA. (from RefSeq NM_001143831)
GALR1	-4.29427	-2.85618	19.3935	0.00195417	0.00729901	galanin receptor 1 (GALR1), mRNA. (from RefSeq NM_001480)
LRRTM3	-4.34012	-0.0921984	72.1596	1.93e-05	0.000239553	leucine rich repeat transmembrane neuronal 3 (LRRTM3), transcript variant 1, mRNA. (from RefSeq NM_178011)
SCG2	-4.3705	-1.41037	27.3052	0.000651405	0.00309821	secretogranin II (SCG2), mRNA. (from RefSeq NM_003469)
CHI3L2	-4.39181	5.13828	14.8005	0.00434955	0.0139251	chitinase 3 like 2 (CHI3L2), transcript variant 3, mRNA. (from RefSeq NM_001025199)
DSG3	-4.45891	-1.13833	44.2394	0.000120663	0.000874474	desmoglein 3 (DSG3), mRNA. (from RefSeq NM_001944)
BLK	-4.68256	3.72254	307.227	5.57e-08	7.21e-06	BLK proto-oncogene, Src family tyrosine kinase (BLK), transcript variant 2, mRNA. (from RefSeq NM_001330465)
DOCK2	-4.72625	3.25109	259.01	1.13e-07	1.05e-05	dedicator of cytokinesis 2 (DOCK2), transcript variant 2, non-coding RNA. (from RefSeq NR_156756)
RFX8	-4.80271	-2.52476	24.0799	0.000985482	0.00427222	RFX family member 8, lacking RFX DNA binding domain (RFX8), transcript variant 4, mRNA. (from RefSeq NM_001367510)
GSC	-4.92924	0.438099	89.1405	8.47e-06	0.000136912	goosecoid homeobox (GSC), mRNA. (from RefSeq NM_173849)
FGF8	-5.15126	-3.44499	12.5527	0.0106089	0.0287773	fibroblast growth factor 8 (FGF8), transcript variant B, mRNA. (from RefSeq NM_006119)
SUSD4	-5.15363	5.14602	367.947	2.63e-08	4.67e-06	sushi domain containing 4 (SUSD4), transcript variant 2, mRNA. (from RefSeq NM_001037175)
PGLYRP2	-5.16685	-2.25719	20.5945	0.00162199	0.00630363	peptidoglycan recognition protein 2 (PGLYRP2), transcript variant 1, mRNA. (from RefSeq NM_052890)
SH2D3C	-5.17414	-3.44327	11.4846	0.0129434	0.0339789	SH2 domain containing 3C (SH2D3C), transcript variant 6, mRNA. (from RefSeq NM_001142534)
CYFIP2	-5.19581	-3.44164	10.891	0.0145375	0.0374774	cytoplasmic FMR1 interacting protein 2 (CYFIP2), transcript variant 3, mRNA. (from RefSeq NM_014376)
PSTPIP1	-5.25079	2.5322	172.701	5.98e-07	2.73e-05	proline-serine-threonine phosphatase interacting protein 1 (PSTPIP1), transcript variant 2, mRNA. (from RefSeq NM_001321135)
ADM	-5.32599	7.07426	2231.63	1.31e-11	1.56e-07	adrenomedullin (ADM), mRNA. (from RefSeq NM_001124)
MMP27	-5.37485	5.67164	97.4539	5.96e-06	0.000107358	matrix metallopeptidase 27 (MMP27), mRNA. (from RefSeq NM_022122)
NID2	-5.4573	-3.27444	11.5025	0.012899	0.0338849	nidogen 2 (NID2), mRNA. (from RefSeq NM_007361)
CXCL8	-5.47375	3.95727	457.465	1.06e-08	2.57e-06	C-X-C motif chemokine ligand 8 (CXCL8), transcript variant 1, mRNA. (from RefSeq NM_000584)
PKHD1L1	-5.48556	4.91773	494.828	7.62e-09	2.21e-06	PKHD1 like 1 (PKHD1L1), mRNA. (from RefSeq NM_177531)
SFN	-5.6316	-3.17074	12.7974	0.0101534	0.0277759	stratifin (SFN), mRNA. (from RefSeq NM_006142)
WDR17	-5.6397	-3.17004	14.8449	0.00718821	0.0209862	WD repeat domain 17 (WDR17), transcript variant 1, mRNA. (from RefSeq NM_170710)
ADGRF5	-5.6613	1.71948	195.915	3.57e-07	2.03e-05	adhesion G protein-coupled receptor F5 (ADGRF5), transcript variant 1, mRNA. (from RefSeq NM_015234)
TGM2	-5.72864	8.8046	101.656	5.05e-06	9.64e-05	transglutaminase 2 (TGM2), transcript variant 2, mRNA. (from RefSeq NM_198951)
CYP4F22	-5.75903	1.32254	94.6761	6.68e-06	0.000117487	cytochrome P450 family 4 subfamily F member 22 (CYP4F22), mRNA. (from RefSeq NM_173483)
CA9	-6.76178	4.49601	400.319	1.85e-08	3.73e-06	carbonic anhydrase 9 (CA9), mRNA. (from RefSeq NM_001216)
SP5	-6.83809	-0.747323	41.8233	0.000147869	0.00103144	Sp5 transcription factor (SP5), mRNA. (from RefSeq NM_001003845)
ANKRD1	-6.96999	4.29233	652.206	2.39e-09	1.54e-06	ankyrin repeat domain 1 (ANKRD1), mRNA. (from RefSeq NM_014391)
DHRS9	-7.32842	4.87608	529.475	5.73e-09	2.01e-06	dehydrogenase/reductase 9 (DHRS9), transcript variant 4, mRNA. (from RefSeq NM_001142271)
